# Supplementary material for: Age-dependent acquisition of pathogenicity by SARS-CoV-2 Omicron BA.5
Source: PubMed Central journal article supplement — Sci Adv. 2023 Sep 22;9(38):eadj1736. doi: 10.1126/sciadv.adj1736 (PMC10516498; doi:10.1126/sciadv.adj1736), 2023-09-22
Supplement: sciadv.adj1736_sm.pdf [file sciadv.adj1736_sm.pdf]

Supplementary Materials for  
**Age-dependent acquisition of pathogenicity by SARS-CoV-2 Omicron BA.5**

Brian Imbiakha *et al.*

Corresponding author: Hector C. Aguilar, [ha363@cornell.edu](mailto:ha363@cornell.edu); Avery August, [averyaugust@cornell.edu](mailto:averyaugust@cornell.edu)

*Sci. Adv.* **9**, eadj1736 (2023)  
DOI: 10.1126/sciadv.adj1736

**This PDF file includes:**

Figs. S1 to S5  
Table S1

# Supplemental Figure 1

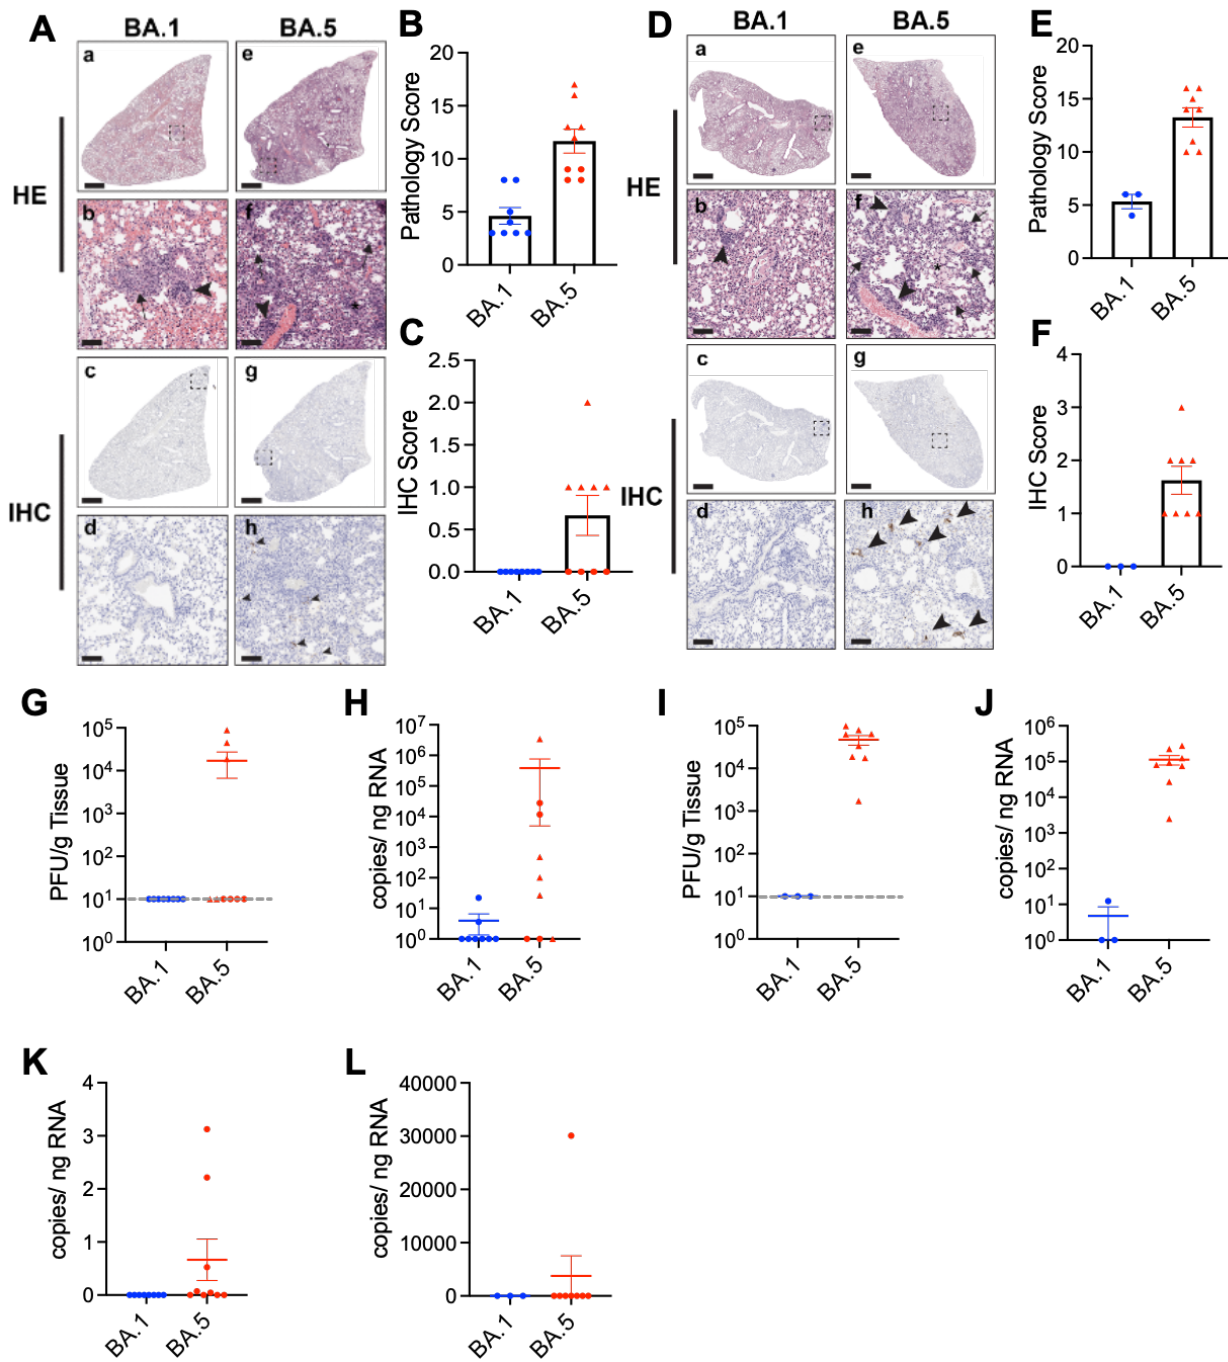

**Figure S1: SARS-CoV-2 Omicron BA.5 induces increased virus titers and pathology following infection.** A-F. K18-hACE2 mice were infected with  $3.25 \times 10^4$  PFU SARS-CoV-2 Omicron BA.1 and BA.5. Lungs were collected for H&E and IHC. A. Representative H&E staining (a,b,e,f) of lung histopathology or IHC for SARS-CoV-2 N protein (c,d,g,h) (one section analyzed per mouse) in Omicron BA.1 infected 3 month old mice at 14 dpi (a-d) or Omicron BA.5 (e-h) (BA.1 n = 8, BA.5 n = 9). Mice infected with Omicron BA.5 had more significant lesions with increased perivascular infiltrates (arrowheads), interstitial infiltrates (asterisk), inflammatory cells in alveoli (arrow), and mild alveolar edema compared to mice infected with Omicron BA.1. Scale bar a,c,e,g = 1 mm ; b,d,f,h = 100  $\mu$ m. For histopathology and IHC analyses, representative images were selected based on the mean pathological score. B. Histopathology scores at death or endpoint. Triangle represents mice euthanized before 14 dpi and circle represent mice euthanized 14 dpi (BA.1 n = 8, BA.5 n = 9). C. IHC score at death or endpoint. Triangles represent mice euthanized before 14 dpi and circles represent mice euthanized 14 dpi (BA.1 n = 8, BA.5 n = 9).

before 14 dpi and circles represent mice euthanized 14 dpi (BA.1  $n = 8$ , BA.5  $n = 9$ ). **D.** Representative H&E staining (a,b,e,f) of lung histopathology or IHC staining with an anti-SARS-CoV-2 N protein antibody (c,d,g,h) (one section analyzed per mouse) at 14 dpi in 5-8 month old mice infected with Omicron BA.1 (a-d) or Omicron BA.5 (e-h) (BA.1  $n = 3$ , BA.5  $n = 8$ ). Mice infected with Omicron BA.5 had more significant lesions with increased perivascular infiltrates (arrowheads), interstitial infiltrates (arrows), edema in alveoli (asterisk), and inflammatory cells in alveoli compared to mice infected with Omicron BA.1. Scale bar a,c,e,g = 1 mm ; b,d,f,h = 100  $\mu\text{m}$ . For histopathology and IHC analyses, representative images were selected based on the mean pathological score. **E.** Histopathological score at death or endpoint. Triangle represents mice euthanized before 14 dpi and circle represent mice euthanized 14 dpi (BA.1  $n = 3$ , BA.5  $n = 8$ ). **F.** IHC scores at death or endpoint. Triangles represent mice euthanized before 14 dpi and circles represent mice euthanized 14 dpi (BA.1  $n = 3$ , BA.5  $n = 8$ ). Data are means  $\pm$  S.E.M. **G.** Virus titers in the lungs of 3-month old mice (BA.1  $n = 8$ , BA.5  $n = 9$ ). Triangles represent mice euthanized before 14 dpi and circles represent mice euthanized 14 dpi. Data are means  $\pm$  S.E.M. **H.** Viral RNA in the lungs of 3-month old mice at endpoint (BA.1  $n = 8$ , BA.5  $n = 9$ ). Data are means  $\pm$  S.E.M. **I.** Virus titers in the lungs of 5-8 month old mice (BA.1  $n = 3$ , BA.5  $n = 8$ ). Data are means  $\pm$  S.E.M. **J.** Viral RNA levels in the lung of 5-8 month old mice (BA.1  $n = 3$ , BA.5  $n = 8$ ). Data are means  $\pm$  S.E.M. **K.** Viral RNA in the brains of 3-month old mice at endpoint (BA.1  $n = 8$ , BA.5  $n = 9$ ). Data are means  $\pm$  S.E.M. **L.** Viral RNA in the brains of 5-8 month old mice at endpoint (BA.1  $n = 3$ , BA.5  $n = 8$ ). Data are means  $\pm$  S.E.M.

## Supplemental Figure 2

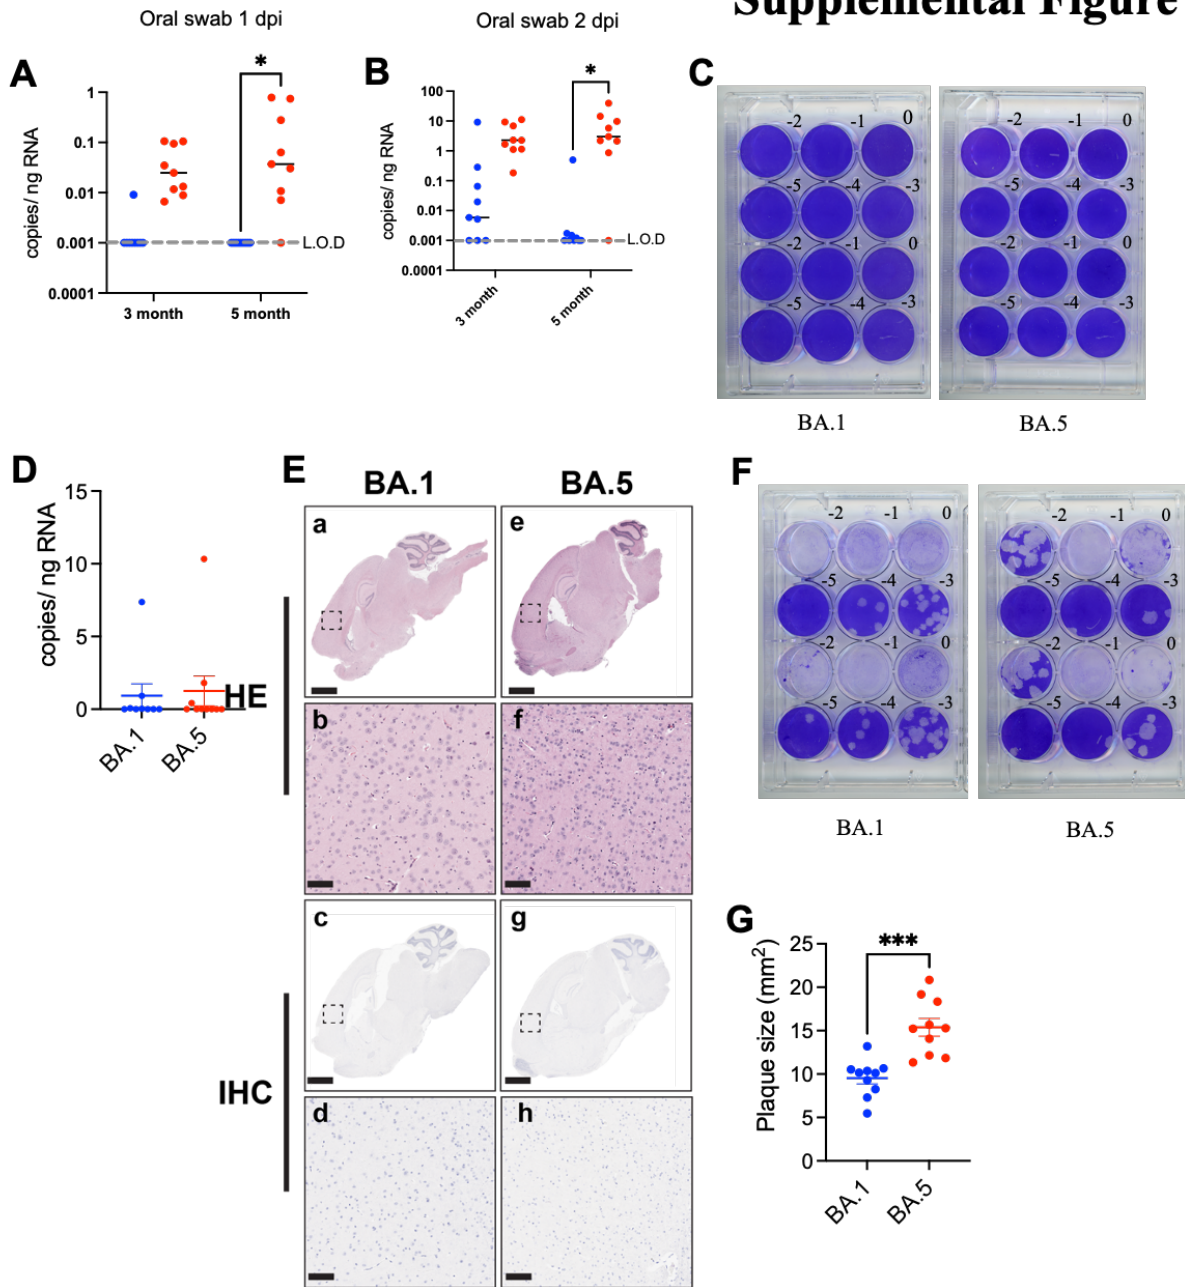

**Figure S2: Viral titers 1, 2 and 5 dpi.** **A.** Viral RNA quantification by RT-qPCR in the oral cavity of 3 and 5 month old K18-hACE2 mice infected with Omicron BA.1 and Omicron BA.5 (BA.1  $n = 9$ , BA.5  $n = 9$ ) at 1 dpi, or **B.** 2 dpi. **C.** Brain plaques from 2 dpi. **D.** Brain viral RNA quantification by RT-qPCR from 5 dpi (BA.1  $n = 9$ , BA.5  $n = 10$ ). **E.** Representative H&E staining (a,b,e,f) or IHC staining with an anti-SARS-CoV-2 N protein antibody (c,d,g,h) (one section analyzed per mouse) of brain tissue at death or study endpoint in K18-hACE2 mice infected with Omicron BA.1 (a-d) or Omicron BA.5 (e-h). The brain of all mice infected with either strain is histologically normal with no evidence of immunolabeling. Scale bar a,c,e,g = 2 mm ; b,d,f,h = 100  $\mu$ m. **F.** Lung plaques, and **G.** Lung plaque area from 5 dpi (BA.1  $n = 10$ , BA.5  $n = 10$ ). One-way ANOVA with Tukey's multiple comparison test.

# Supplemental Figure 3

## Granulocytes BALF

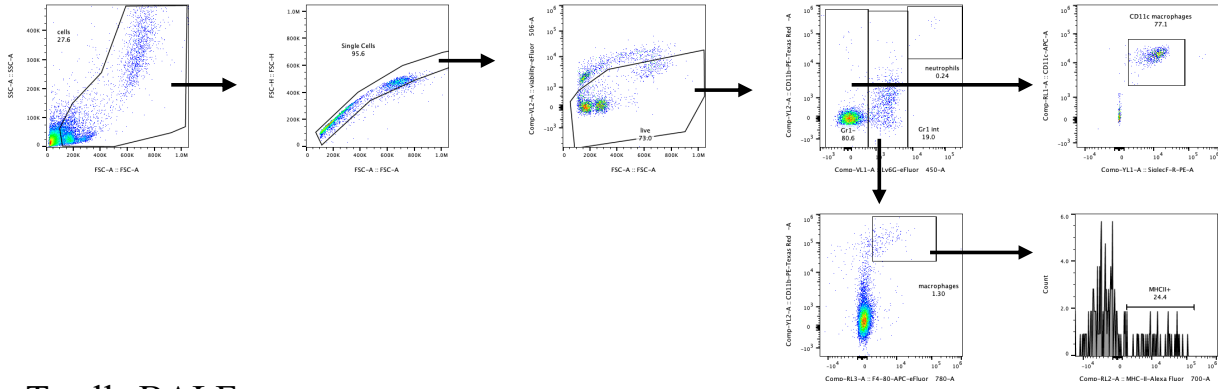

## T cells BALF

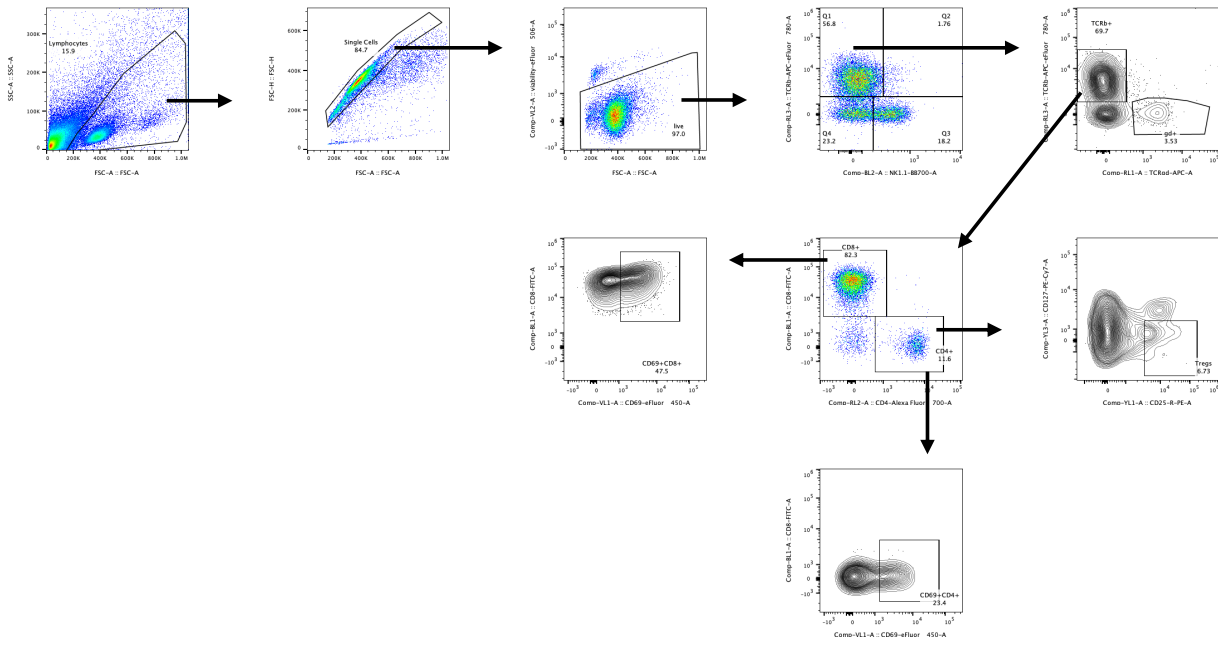

## B cells

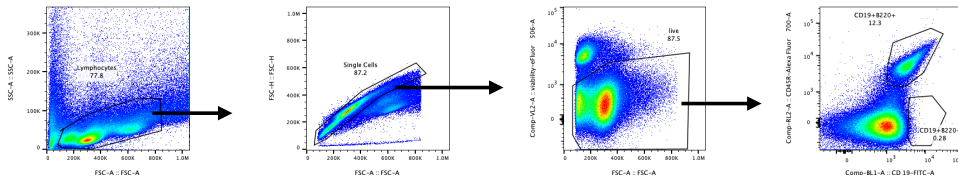

**Figure S3: Gating strategy for analysis of lung immune cells.** Cells were stained and analyzed via flow cytometry. Representative images are shown to demonstrate the gating strategy for the indicated populations.

## Supplemental Figure 4

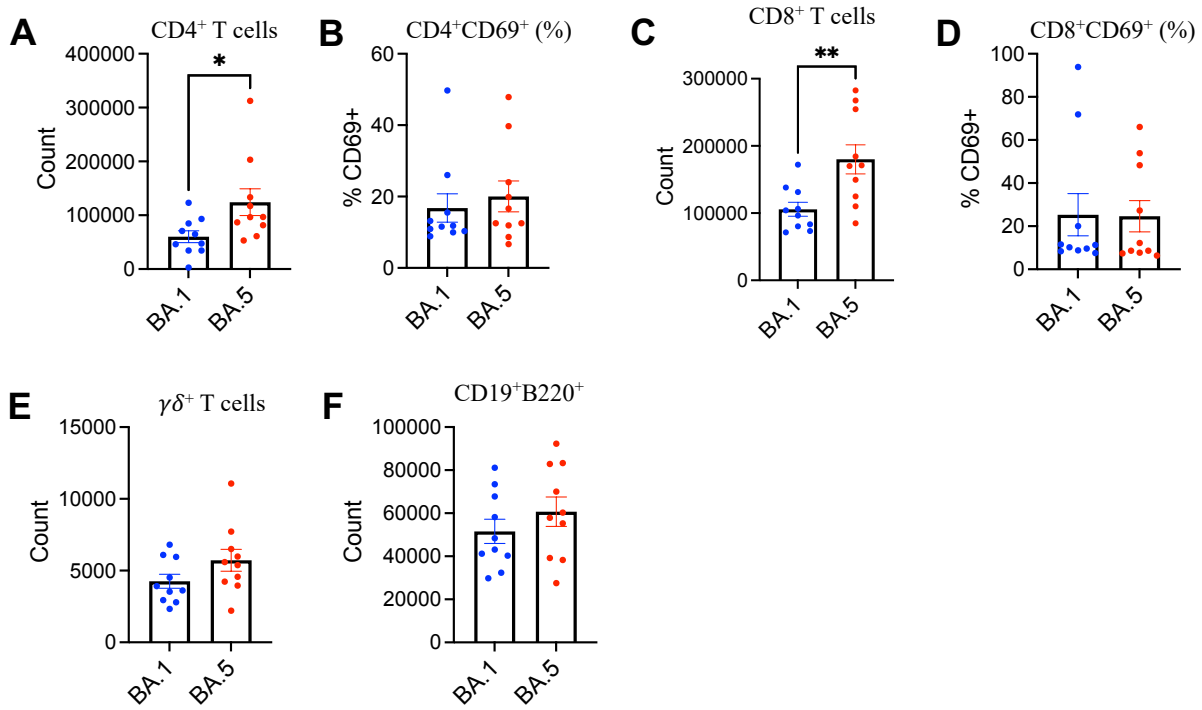

**Figure S4: Lymph node immune cell profile following SARS-CoV-2 Omicron infection.** K18-hACE2 mice were infected with SARS-CoV-2 Omicron BA.1 and BA.5 (BA.1  $n = 10$ , BA.5  $n = 10$ ). At 5 dpi, mediastinal lymph nodes were collected and immune cells were analyzed by flow cytometry. **A.** Total CD4<sup>+</sup> cells in the lymph nodes. **B.** Percent activated CD4<sup>+</sup> T cells. **C.** CD8<sup>+</sup> T cells in the lymph node. **D.** Percent activated CD8<sup>+</sup> T cells. **E.**  $\gamma\delta$  T cells in the lymph node. **F.** Total B cells in the lymph node. All data are means  $\pm$  S.E.M.

# Supplemental Figure 5

|               |                                                                  |     |
|---------------|------------------------------------------------------------------|-----|
|               | -----NTD-----                                                    |     |
| Omicron BA.5  | MFVFLVLLPLVSSQCVNLITRTQ---SYTNSFTRGVVYPDKVFRSSVLHSTQDLFLPFFS     | 57  |
| Omicron BA.1  | MFVFLVLLPLVSSQCVNLTRTQLPPAYTNSFTRGVVYPDKVFRSSVLHSTQDLFLPFFS      | 60  |
| Wuhan-Hu-1    | MFVFLVLLPLVSSQCVNLTRTQLPPAYTNSFTRGVVYPDKVFRSSVLHSTQDLFLPFFS      | 60  |
| -----         |                                                                  |     |
| Omicron BA.5  | NVTWFHAI--SGTNGIKRFDNPVLPFNDGVYFASTEKSNIIRGWIFGTTLDSKTQSLIV      | 115 |
| Omicron BA.1  | NVTWFHVI--SGTNGTKRFDNPVLPFNDGVYFASIEKSNIIRGWIFGTTLDSKTQSLIV      | 118 |
| Wuhan-Hu-1    | NVTWFHAIHVSGTNGTKRFDNPVLPFNDGVYFASTEKSNIIRGWIFGTTLDSKTQSLIV      | 120 |
| -----         |                                                                  |     |
| Omicron BA.5  | NNATNVVIKVFCEFCNDPFLDVYYHKNNKSWMESEFRVYSSANNCTFEYVSQPFLMDLE      | 175 |
| Omicron BA.1  | NNATNVVIKVFCEFCNDPFLDVYYHKNNKSWMESEFRVYSSANNCTFEYVSQPFLMDLE      | 178 |
| Wuhan-Hu-1    | NNATNVVIKVFCEFCNDPFLGVYYHKNNKSWMESEFRVYSSANNCTFEYVSQPFLMDLE      | 180 |
| -----         |                                                                  |     |
| Omicron BA.5  | GKQGNFKNLRFEVFKNIDGYFKIYSKHTPIINL--GRDLPQGFSALEPLVDLPIGINITRF    | 233 |
| Omicron BA.1  | GKQGNFKNLRFEVFKNIDGYFKIYSKHTPIIVREPEDLPQGFSALEPLVDLPIGINITRF     | 238 |
| Wuhan-Hu-1    | GKQGNFKNLRFEVFKNIDGYFKIYSKHTPIINL--VRDLPQGFSALEPLVDLPIGINITRF    | 238 |
| -----         |                                                                  |     |
| Omicron BA.5  | QTLALHRSYLT PGDSSSGWTAGAAAYVGYLQPRTFLLKYNENGTITDAVDCALDPLSE      | 293 |
| Omicron BA.1  | QTLALHRSYLT PGDSSSGWTAGAAAYVGYLQPRTFLLKYNENGTITDAVDCALDPLSE      | 298 |
| Wuhan-Hu-1    | QTLALHRSYLT PGDSSSGWTAGAAAYVGYLQPRTFLLKYNENGTITDAVDCALDPLSE      | 298 |
| -----         |                                                                  |     |
| Omicron BA.5  | TKCTLKSFVTEKGIYQTSNFRVQPTESIVRFPNITNLCPFDEVFNATRFASVYAWNRKRI     | 353 |
| Omicron BA.1  | TKCTLKSFVTEKGIYQTSNFRVQPTESIVRFPNITNLCPFDEVFNATRFASVYAWNRKRI     | 358 |
| Wuhan-Hu-1    | TKCTLKSFVTEKGIYQTSNFRVQPTESIVRFPNITNLCPFGEVFNATRFASVYAWNRKRI     | 358 |
| -----RBD----- |                                                                  |     |
| Omicron BA.5  | SNCVADYSVLYNFAPFFAFKCYGVSPTKLNLDLCFTNVYADSFVIRGNEVSIAPGQTGNI     | 413 |
| Omicron BA.1  | SNCVADYSVLYNLAPFFTFCYGVSPKLNLDLCFTNVYADSFVIRGDEVRIAPGQTGNI       | 418 |
| Wuhan-Hu-1    | SNCVADYSVLYNSASFSTFKCYGVSPTKLNLDLCFTNVYADSFVIRGDEVRIAPGQTGKI     | 418 |
| -----         |                                                                  |     |
| Omicron BA.5  | ADYNYKLPDDFTGCVIAWNSNKLDSKVGNYNYRRLFRKSNLKPFFERDISTEIIYQAGNK     | 473 |
| Omicron BA.1  | ADYNYKLPDDFTGCVIAWNSNKLDSKVSIGNYNYLYRRLFRKSNLKPFFERDISTEIIYQAGNK | 478 |
| Wuhan-Hu-1    | ADYNYKLPDDFTGCVIAWNSNKLDSKVGNYNYLYRRLFRKSNLKPFFERDISTEIIYQAGST   | 478 |
| -----         |                                                                  |     |
| Omicron BA.5  | PCNGVAGVNCYFPLQSYGFRPTYGVGHQPYRVVLSFELLHAPATVCGPKKSTNLVKNKC      | 533 |
| Omicron BA.1  | PCNGVAGVNCYFPLRSYSFRPTYGVGHQPYRVVLSFELLHAPATVCGPKKSTNLVKNKC      | 538 |
| Wuhan-Hu-1    | PCNGVEGFNCYFPLQSYGFQPTNGVGYQPYRVVLSFELLHAPATVCGPKKSTNLVKNKC      | 538 |
| -----         |                                                                  |     |
| Omicron BA.5  | VNFNFNGLTGTGVLTESNKKFLPFQFGRDIADTTDAVRDPQTEIILDITPCSFGGVSVI      | 593 |
| Omicron BA.1  | VNFNFNGLKGTGVLTESNKKFLPFQFGRDIADTTDAVRDPQTEIILDITPCSFGGVSVI      | 598 |
| Wuhan-Hu-1    | VNFNFNGLTGTGVLTESNKKFLPFQFGRDIADTTDAVRDPQTEIILDITPCSFGGVSVI      | 598 |
| -----         |                                                                  |     |
| Omicron BA.5  | TPGTNTSNQVAVLYQGVNCTEVPVAIHADQLTPTRVYSTGNSVVFQTRAGCLIGAEYVNN     | 653 |
| Omicron BA.1  | TPGTNTSNQVAVLYQGVNCTEVPVAIHADQLTPTRVYSTGNSVVFQTRAGCLIGAEYVNN     | 658 |
| Wuhan-Hu-1    | TPGTNTSNQVAVLYQDVNCTEVPVAIHADQLTPTRVYSTGNSVVFQTRAGCLIGAEHVNN     | 658 |
| -----         |                                                                  |     |
|               | S1/S2                                                            |     |
| Omicron BA.5  | SYECDIPIGAGICASYQTQTKSHRRARSVASQSI IAYTMSLGAENSVAYSNNSIAIPTNF    | 713 |
| Omicron BA.1  | SYECDIPIGAGICASYQTQTKSHRRARSVASQSI IAYTMSLGAENSVAYSNNSIAIPTNF    | 718 |
| Wuhan-Hu-1    | SYECDIPIGAGICASYQTQTNSPRRARSVASQSI IAYTMSLGAENSVAYSNNSIAIPTNF    | 718 |
| -----         |                                                                  |     |
| Omicron BA.5  | TISVTEILPVSMTKTSVDCTMYICGDSTEC SNLLQYGSFCTQLKRALTGI AVEQDKNT     | 773 |
| Omicron BA.1  | TISVTEILPVSMTKTSVDCTMYICGDSTEC SNLLQYGSFCTQLKRALTGI AVEQDKNT     | 778 |
| Wuhan-Hu-1    | TISVTEILPVSMTKTSVDCTMYICGDSTEC SNLLQYGSFCTQLNRALTGI AVEQDKNT     | 778 |

S2' --fusion peptide----

|               |                                                                |      |
|---------------|----------------------------------------------------------------|------|
| Omicron BA.5  | QEVFAQVKQIYKTPPIKYFGGFNFSQILPDPSKPSKRSFIEDLLFNKVTLADAGFIKQYG   | 833  |
| Omicron BA.1  | QEVFAQVKQIYKTPPIKYFGGFNFSQILPDPSKPSKRSFIEDLLFNKVTLADAGFIKQYG   | 838  |
| Wuhan-Hu-1    | QEVFAQVKQIYKTPPIKDFGGFNFSQILPDPSKPSKRSFIEDLLFNKVTLADAGFIKQYG   | 838  |
| -----         |                                                                |      |
| Omicron BA.5  | DCLGDIAARDLICAQKFNGLTVLPPLLTDEMQIAQYTSALLAGTITSGWTFGAGAALQIPF  | 893  |
| Omicron BA.1  | DCLGDIAARDLICAQKFGKGLTVLPPLLTDEMQIAQYTSALLAGTITSGWTFGAGAALQIPF | 898  |
| Wuhan-Hu-1    | DCLGDIAARDLICAQKFNGLTVLPPLLTDEMQIAQYTSALLAGTITSGWTFGAGAALQIPF  | 898  |
| -----HR1----- |                                                                |      |
| Omicron BA.5  | AMQMAYRFNGIGVTVQNVLYENQKLIANQFNLSAIGKIQDSLSTASALGKLDVNVHNAQA   | 953  |
| Omicron BA.1  | AMQMAYRFNGIGVTVQNVLYENQKLIANQFNLSAIGKIQDSLSTASALGKLDVNVHNAQA   | 958  |
| Wuhan-Hu-1    | AMQMAYRFNGIGVTVQNVLYENQKLIANQFNLSAIGKIQDSLSTASALGKLDVNVQNAQA   | 958  |
| -----HR2----- |                                                                |      |
| Omicron BA.5  | LNTLVKQLSSKFGAISSVLNDILSRDLKVEAEVQIDRLITGRLQSLQTYVTTQQLIRAAEI  | 1013 |
| Omicron BA.1  | LNTLVKQLSSKFGAISSVLNDIFSRDLKVEAEVQIDRLITGRLQSLQTYVTTQQLIRAAEI  | 1018 |
| Wuhan-Hu-1    | LNTLVKQLSSNFGAISSVLNDILSRDLKVEAEVQIDRLITGRLQSLQTYVTTQQLIRAAEI  | 1018 |
| -----TM-----  |                                                                |      |
| Omicron BA.5  | RASANLAATKMSECVLGQSKRVDFCGKGYHLMSFPQSAPHGVVFLHVTYVPAQEKNFTTA   | 1073 |
| Omicron BA.1  | RASANLAATKMSECVLGQSKRVDFCGKGYHLMSFPQSAPHGVVFLHVTYVPAQEKNFTTA   | 1078 |
| Wuhan-Hu-1    | RASANLAATKMSECVLGQSKRVDFCGKGYHLMSFPQSAPHGVVFLHVTYVPAQEKNFTTA   | 1078 |
| -----         |                                                                |      |
| Omicron BA.5  | PAICHDGKAHFPRGCVFVSNNGTHWFVTVQRNFYEPQIITTDNTFVSGNCDVVIQVNNVTY  | 1133 |
| Omicron BA.1  | PAICHDGKAHFPRGCVFVSNNGTHWFVTVQRNFYEPQIITTDNTFVSGNCDVVIQVNNVTY  | 1138 |
| Wuhan-Hu-1    | PAICHDGKAHFPRGCVFVSNNGTHWFVTVQRNFYEPQIITTDNTFVSGNCDVVIQVNNVTY  | 1138 |
| -----         |                                                                |      |
| Omicron BA.5  | DPLQPELDSFKEELDKYFKNHTSPDVLGDISGINASVVNIQKEIDRLNEVAKNLNESLI    | 1193 |
| Omicron BA.1  | DPLQPELDSFKEELDKYFKNHTSPDVLGDISGINASVVNIQKEIDRLNEVAKNLNESLI    | 1198 |
| Wuhan-Hu-1    | DPLQPELDSFKEELDKYFKNHTSPDVLGDISGINASVVNIQKEIDRLNEVAKNLNESLI    | 1198 |
| -----CT-----  |                                                                |      |
| Omicron BA.5  | DLQELGKYEQYIKWPWYIWLGFIAGLIAIVMVTIMLCCMTSCCSCLKGCSCGSCCKFDE    | 1253 |
| Omicron BA.1  | DLQELGKYEQYIKWPWYIWLGFIAGLIAIVMVTIMLCCMTSCCSCLKGCSCGSCCKFDE    | 1258 |
| Wuhan-Hu-1    | DLQELGKYEQYIKWPWYIWLGFIAGLIAIVMVTIMLCCMTSCCSCLKGCSCGSCCKFDE    | 1258 |
| -----         |                                                                |      |
| Omicron BA.5  | DDSEPVKGVKLYHT*                                                | 1269 |
| Omicron BA.1  | DDSEPVKGVKLYHT*                                                | 1274 |
| Wuhan-Hu-1    | DDSEPVKGVKLYHT*                                                | 1274 |

**Figure S5: Sequence alignment of SARS-CoV-2 S proteins comparing SARS-CoV-2 Wuhan to Omicron BA.1 and Omicron BA.5.**



## Supplemental Table 1

| Supplemental Table 1 |                     |                                  |
|----------------------|---------------------|----------------------------------|
| <b>Cell Markers</b>  | <b>Fluorochrome</b> | <b>Manufacturer and Catalog#</b> |
| CD8                  | fitc                | invitrogen 11-0081-85            |
| NK1.1                | BB700               | BD BioSciences 566503            |
| CD25                 | PE                  | invitrogen 12-0251-83            |
| KLRG1                | pe-TexasRed         | BD BioSciences 565393            |
| CD127                | PE-Cy7              | invitrogen 25-1271-82            |
| TCRgd                | APC                 | BioLegend 118116                 |
| CD4                  | AF700               | invitrogen 56-0041-82            |
| TCRb                 | APC-cy7             | BioLegend 109220                 |
| CD69                 | Pacific Blue        | BioLegend 104524                 |
| CD62L                | Pac Orange          | BioLegend 104433                 |
| CD19                 | fitc                | invitrogen 11-0193-85            |
| IgG2a, IgG2b         | BB700               | BD Biosciences 745969            |
| CD138                | PE                  | invitrogen MA5-23527             |
| IgM                  | PE-ef610            | invitrogen 61-5790-82            |
| CD23                 | PE-Cy7              | invitrogen 25-0232-82            |
| Fas                  | APC                 | invitrogen 17-0951-82            |
| CD45R (B220)         | AF700               | invitrogen 56-0452-82            |
| CD27                 | APC-AF780           | invitrogen 47-0271-82            |
| GL7                  | ef450               | invitrogen 48-5902-82            |
| IgD                  | SB600               | invitrogen 63-5993-82            |
| c-kit                | Fitc                | BD BioSciences 553354            |
| CD69                 | BB700               | BD BioSciences 566501            |
| Siglec F             | PE                  | BD BioSciences 552126            |
| CD11b                | PE-Dazzle594        | BioLegend 101256                 |
| CD49b                | PECy7               | BioLegend 103518                 |
| CD11c                | APC                 | BioLegend 117310                 |
| MHCII                | AF700               | invitrogen 56-5321-80            |
| F4/80                | APC-Cy7             | BioLegend 123118                 |
| Ly6G                 | Pacific Blue        | BioLegend 127612                 |
| viability            | ef506               | invitrogen 65-0866-14            |
| CD16/32              | ---                 | invitrogen 14-0161-85            |

Flow cytometry antibodies.
